1 **Population movement, city closure and spatial transmission of the 2019-nCoV**

2 **infection in China**

3 **Authors:** Siqi Ai, Guanghu Zhu, Fei Tian, Huan Li, Yuan Gao, Yinglin Wu, Qiyong

4 Liu, Hualiang Lin

5 **Author affiliations:**

6 Department of Epidemiology, School of Public Health, Sun Yat-sen University,

7 Guangzhou, 510080, China (S.A, F.T, H.L, Y.W, H.L); School of Mathematics and

8 Computing Science, Guilin University of Electronic Technology, Guilin, 541004,

9 China (G.Z); Key Laboratory of Infectious Disease Prevention and Control,

10 Collaborative Innovation Center for Diagnosis and Treatment of Infectious Diseases,

11 National Institute for Communicable Disease Control and Prevention, Chinese Center

12 for Disease Control and Prevention, Beijing, 102206, China (Y.G, Q.L).

13 **Corresponding author:** Hualiang Lin, School of Public Health, Sun Yat-sen

14 University, 74 Zhongshan 2nd Road, Guangzhou, 510080, China. E-mail:

15 [linhualiang@mail.sysu.edu.cn](mailto:linhualiang@mail.sysu.edu.cn).

## 16 **Abstract**

17 The outbreak of pneumonia caused by a novel coronavirus (2019-nCoV) in Wuhan  
18 City of China obtained global concern, the population outflow from Wuhan has  
19 contributed to spatial expansion in other parts of China. We examined the effects of  
20 population outflow from Wuhan on the 2019-nCoV transmission in other provinces  
21 and cities of China, as well as the impacts of the city closure in Wuhan. We observed  
22 a significantly positive association between population movement and the number of  
23 cases. Further analysis revealed that if the city closure policy was implemented two  
24 days earlier, 1420 (95% CI: 1059, 1833) cases could be prevented, and if two days  
25 later, 1462 (95% CI: 1090, 1886) more cases would be possible. Our findings suggest  
26 that population movement might be one important trigger of the 2019-nCoV infection  
27 transmission in China, and the policy of city closure is effective to prevent the  
28 epidemic.

29 **Keywords:** 2019-nCoV infection; Wuhan; Population movement; Infection  
30 transmission

31

## 32 **Introduction**

33 In December 2019, a series of pneumonia cases caused by a novel coronavirus,  
34 namely 2019-nCoV, emerged in Wuhan, the capital city of Hubei Province in China  
35 (1). Similar with severe acute respiratory syndrome (SARS), the Wuhan pneumonia  
36 outbreak was highly suspected to be linked to the wild animals in the seafood market,  
37 although the definitive source of this virus was not clear yet (2).

38 As of Jan 31, 2020, the infection has been transmitted to all the provinces in China  
39 and a few other countries. Epidemiology evidence shown that most of the cases had a  
40 history of living or travelling to Wuhan, the household cluster cases and cases of  
41 health-care workers indicated the human-to-human transmission route (3), which  
42 might be the reason for a rapid increasing rate of infection across the country and  
43 globally (4).

44 Considering the person-to-person transmission and the large travel volume during  
45 the traditional Chinese New Year (the largest annual population movement in the  
46 world), it is expected that the population movement would lead to further expansion  
47 of the infection, so the government imposed a lockdown on Wuhan City at 10:00 am  
48 on January 23, as well as some other cities later on. However, an estimated 5 million  
49 individuals had already left Wuhan for the holiday or travelling, some of which rushed  
50 out after the lockdown announcement (5). In addition, the novel coronavirus is  
51 infectious during the incubation period and when the symptoms are not obvious,  
52 which is likely to make the huge floating population potential sources of infection (6).  
53 Therefore, it is reasonable to hypothesize that the population transported from Wuhan  
54 may have a significant impact on the potential outbreaks in other parts of China.

55 Recent studies on the novel coronavirus pneumonia focused more on its etiology (7,  
56 8), transmission route (9, 10), and epidemiological characteristics (11, 12), there is  
57 still a lack of investigating the relationship between the migrating population and the  
58 outbreak, which is of great importance for making intervention policies. Thus, we  
59 conducted this study with the following objectives: 1) to depict the impacts of the

60 population movement on the spatial transmission of the 2019-nCoV cases at the  
61 provincial and city levels in China; 2) to estimate the potential outbreak risk at areas  
62 with the population outflowed from Wuhan; 3) to evaluate the effectiveness of the city  
63 closure measures on the epidemic control.

64

## 65 **Methods**

### 66 **Data collection**

67 The data on the daily number of cases were derived from the real-time update of the  
68 China Health Commission (<http://www.nhc.gov.cn/>), 2019-nCoV epidemic report on  
69 Phoenix and Dingxiangyuan website. The case definition has been introduced  
70 previously (13, 14). In brief, a confirmed case was defined as a pneumonia that was  
71 laboratory confirmed 2019-nCoV infection with related respiratory symptoms and a  
72 travel history to Wuhan or direct contact with patients from Wuhan. We collected each  
73 reported 2019-nCoV case in mainland China till 12:00 pm January 31, 2020.

74

### 75 **The floating population**

76 As the city closure took place at 10:00 AM Jan 23<sup>rd</sup>, 2020, and the incubation period  
77 of the infection was estimated to be about 3-7 days (15), we obtained the daily index  
78 of population outflow from Wuhan and the proportion of the daily index from Wuhan  
79 to other provinces and top 50 cities, from January 1 to 31 in 2020, the information  
80 was retrieved through the Spring Festival travel information of China released by  
81 Baidu Qianxi. The data is consisted of Baidu Location Based Services (LBS) and

82 Baidu Tianyan, using the positioning system and transportation information system,  
83 which be display dynamic visual regional population outflow in real-time. Data of  
84 Baidu Qianxi was freely available to the public (<http://qianxi.baidu.com>).

85

## 86 **Statistical analysis**

### 87 **Number of 2019-nCoV cases per unit outflow population**

88 The daily index of population outflow from Wuhan to other provinces and top 50  
89 cities was obtained by multiplying the daily index of population outflow within  
90 Wuhan by the corresponding proportion for each province. To evaluate the effect of  
91 prevention and control measures of the local government, we calculated the number  
92 of 2019-nCoV cases per unit outflow population, the formula can be specified as:

93 The total index of outflow population from Wuhan from Jan 1 to 31:

$$94 \quad A = \{a_i\} (i = 1, 2, \dots, 31)$$

95 The daily proportion of the daily index from Wuhan to other provinces from Jan 1 to  
96 31:

$$97 \quad B = \{b_{ij}\} (i = 1, 2, \dots, 31; j = 1, 2, \dots, 31)$$

98 The cumulative 2019-nCoV cases in each province from Jan 1 to 31:

$$99 \quad C = \{c_j\} (j = 1, 2, \dots, 31)$$

100 The total index of population inflow from Wuhan to other provinces:

$$101 \quad D = \{d_j\} (j = 1, 2, \dots, 31)$$

102 Number of cases per unit outflow population for each province:

$$103 \quad \sum_{j=1}^{31} c_j / \sum_{j=1}^{31} d_j$$

104 **Evaluation of the effects of earlier city closure dates**

105 After the city closure was taken in force, some population still outflowed from Wuhan.

106 We subtracted the outflow index on Jan 23 from the average outflow index from Jan

107 24 to 31, to obtain the index of outflow population within Wuhan reduced by the

108 advance city closure on Jan 23 and 22 (the advance outflow index). And then we

109 calculated the average proportion of the outflow index from Jan 24 to 31 for each

110 province (the average proportion). The number of cases reduced by the advance city

111 closure in each province was estimated by multiplied the advance outflow index by

112 the average proportion and one corresponding unit. The formula can be specified as:

113 The reduced index of outflow population:

114 
$$\sum_{i=1}^p a_{n+1-i}$$

115 Here, n was the date that government announced city closure; p was the advance days

116 of city closure.

117 The increased index of outflow population:

118 
$$\frac{\sum_{i=n+1}^m a_i}{m-n}, \quad n=23, m=31$$

119 The net loss of index of outflow population:

120 
$$\sum_{i=1}^p a_{n+1-i} - p \frac{\sum_{i=n+1}^m a_i}{m-n}, \quad n=23, m=31$$

121 The average proportion of the outflow index from Wuhan into each province during

122 the city closure:

123 
$$\frac{\sum_{i=n+1}^m b_{ij}}{m-n}, \quad n = 23, m = 31$$

124 The net loss index of outflow population caused by advance Wuhan city closure for  
125 each province:

126 
$$\left( \sum_{i=1}^p a_{n+1-i} - p \frac{\sum_{i=n+1}^m a_i}{m-n} \right) \frac{\sum_{i=n+1}^m b_{ij}}{m-n}, \quad n = 23, m = 31$$

127 The total reduced number of 2019-nCoV cases:

128 
$$\sum_{j=1}^{31} \left\{ \left( \sum_{i=1}^p a_{n+1-i} - p \frac{\sum_{i=n+1}^m a_i}{m-n} \right) \frac{\sum_{i=n+1}^m b_{ij}}{m-n} \cdot \frac{\sum_{j=1}^{31} c_j}{\sum_{j=1}^{31} d_j} \right\}, \quad n = 23, m = 31$$

129 Similarly, we evaluated the impacts of one-day and two-day delayed city closure. We  
130 took the average index of the population outflow between Jan 21 and 23 as the daily  
131 index of population outflow before the city closure, and used the same calculation  
132 method to estimate the index of population outflow within Wuhan increased by the  
133 delayed city closure on Jan 24 and Jan 25 (the delayed outflow index). We multiplied  
134 the delayed outflow index by the average proportion and one corresponding unit to  
135 estimate the increased number of cases caused by one-day and two-day delayed city  
136 closure in each province.

137

## 138 **Results**

139 As of January 31, 2020, a total of 11791 confirmed cases and 259 deaths due to the  
140 2019-nCoV infection were reported in China, which were widely dispersed in all of  
141 31 provincial administrative areas. The overall trend of 2019-nCoV cases is upward.

142 During the period of January 11, 2020 through January 31, the cumulative number of  
143 cities infected with 2019-nCoV cases increased rapidly (appendix). A total of 313  
144 cities in mainland China reported the occurrence of 2019-nCoV infection, of which  
145 the number of reported cases from January 20 to 29 increased rapidly from 7 to 313,  
146 an increase of nearly 44 times. Among the cities, 97 of them belong to the regions  
147 with high population exodus out of Wuhan, and 7138 cases have been reported,  
148 accounting for 83.23% of the total reported cases outside Wuhan (appendix).

149 Population outflow of Wuhan could be divided into four periods based on the  
150 migration data of Baidu (figure 1 and 2). In the first stage from Jan 1 to Jan10,  
151 migrant population flowed out of Wuhan normally and returned to hometown without  
152 the influence of the epidemic situation. At this point, the mean daily index of  
153 population outflow was 58039.71 (95% CI: 48883.38-66454.00), and 2019-nCoV  
154 cases were mainly distributed in Wuhan. From beginning of Spring Festival travel  
155 rush on Jan 10 and announcement of 2019-nCoV infection, the mean index of  
156 population outflow rose to 66777.98 (95% CI: 61125.90-72962.78), which increased  
157 by 15.1% compared with the previous period. Meanwhile, 2019-nCoV cases  
158 gradually appeared in Wuhan and several nearby cities. The third period was from  
159 January 20 to 23 when Academician Nanshan Zhong disclosed the human-to-human  
160 transmission and a large number of Wuhan residents fled from Wuhan with increasing  
161 panic. The corresponding mean index of population outflow of this period surged to  
162 112385.88 (95% CI: 107367.44-118403.21), which increased by 93.6% comparing to  
163 the earlier period. Thereafter, a strict city closure policy was implemented to prohibit



164 the population relocation from Wuhan. In the wake of sharp decline of outflow  
165 population from Wuhan, the index reduced to 9180·29 (95% CI: 3055·35-19101·40),  
166 falling by 91·8% comparing with the third period and the effective controlling of the  
167 outflow population prevented suspected cases from spreading to the whole country,  
168 however, 2019-nCoV cases has been widely dispersed in all of 31 provinces.

169 We applied scatter diagram to demonstrate the association between the number  
170 of 2019-nCoV cases and index of outflow population at the scales of province and city.  
171 In general, at the scale of province (figure 3), outflow population from Wuhan was  
172 mainly distributed in Henan, Hunan, Guangdong, Anhui, Zhejiang, etc. And the top  
173 four provinces with the most serious epidemic were Zhejiang, Guangdong, Henan,  
174 and Hunan provinces. Therefore, we could observe that there were more 2019-nCoV  
175 cases in the provinces with higher index of outflow population. Nevertheless, the two  
176 provinces of Zhejiang and Guangdong with relatively lower index of outflow  
177 population had more 2019-nCoV cases compared with Henan and Hunan provinces.  
178 In Henan, the index of outflow population was about 50000, while there were fewer  
179 than 450 cases, which might be lower than expected. In contrast, about 600 confirmed  
180 cases were observed in Zhejiang, which had only one fifth of outflow population of  
181 Henan. Similar results were obtained using the number cases per unit outflow  
182 population (appendix). The mean value of the number of 2019-nCoV cases per unit  
183 outflow population across the whole country was 129·72, however, the value in  
184 Zhejiang province was more than 450 and the corresponding result in Henan was  
185 lower than average.

186 At the city-level analysis (figure 4), we observed that there was a large number  
187 of cases in the cities of Hubei province such as Huanggang, Xiaogan, Xiangyang,  
188 Jingzhou, etc. Overall, the association between the number of 2019-nCoV cases and  
189 index of outflow population at the city-level was in line with that at the provincial  
190 level, which both showed that the cities with more index of outflow population would  
191 trigger more cases. Similarly, we observed some cities deviated from the general trend  
192 including Wenzhou, Taizhou, Xuchang, Luoyang, and Guiyang. For instance, the  
193 index of outflow population of Wenzhou and Luoyang was close to identical level,  
194 whereas there was tremendous difference in the number of 2019-nCoV cases in the  
195 two cities. From the city of Taizhou and Xuchang, we could obtain the analogous  
196 results.

197 To evaluate the effect of the city closure on the infection transmission one and  
198 two days in advance, we used the index of population outflow of January 21-23, 2020  
199 when the Wuhan was still open and index of population outflow of January 24-31,  
200 2020 when the city closure policy had been implemented, and the calculations gave  
201 the reduced index of population outflow: 102206.69 for city closure one day in  
202 advance and 211429.60 for city closure two days in advance. In addition, we obtained  
203 the reduced index of population outflow of each other province and correspondingly  
204 reduced 2019-nCoV cases. Finally, about 687 and 1420 2019-nCoV cases would be  
205 avoided with implementing city closure policy one and two days in advance (table 1).  
206 Consistently, if city closure policy of Wuhan was delayed by one or two days, there  
207 would be 722 or 1462 extra 2019-nCoV cases respectively.

208

209 **Table 1. The impact of different city closure dates on the number of 2019-nCoV**

210 **infections in China**

| <b>Alternative implementing dates</b> | <b>Reduced or increased 2019-nCoV cases*</b> | <b>95% CI*</b> |
|---------------------------------------|----------------------------------------------|----------------|
| Two days earlier: 2020-01-21          | -1420                                        | -1833, -1059   |
| One day earlier: 2020-01-22           | -687                                         | -886, -512     |
| One day later: 2020-01-24             | 722                                          | 539, 932       |
| Two days later: 2020-01-25            | 1462                                         | 1090, 1886     |

211 \*Table footnotes: 2019-nCoV=2019 novel coronavirus. CI=confidence interval.

212

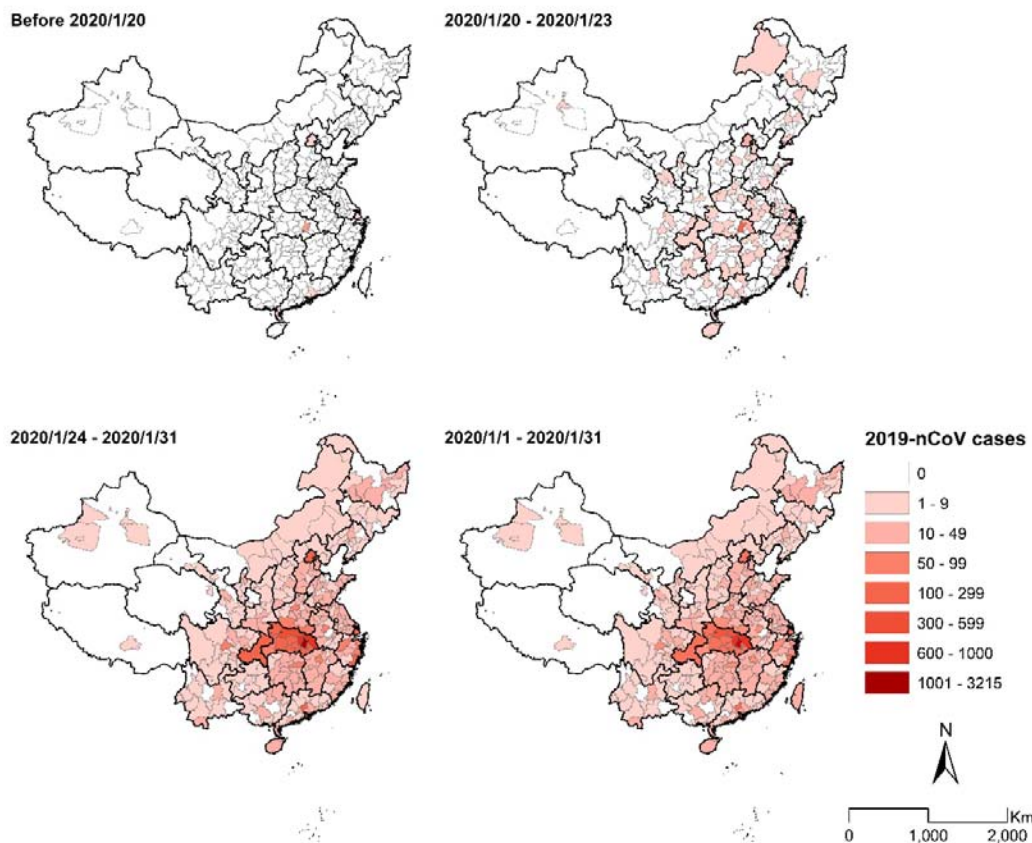

213

214 **Figure 1. The spatial distribution of 2019-nCoV cases in China during period of**

215 **January 1-31, 2020.**

216

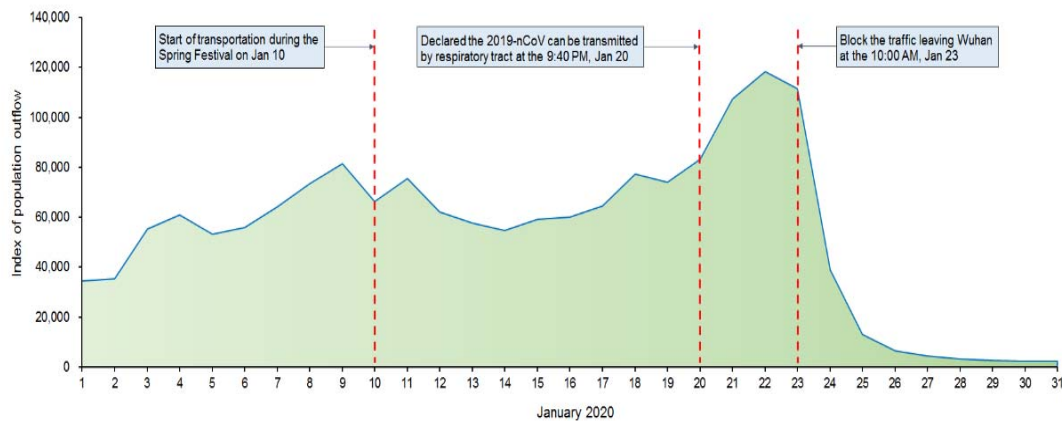

217

218 **Figure 2. Index of population outflow of Wuhan City during period of January**

219 **1-31, 2020.**

220

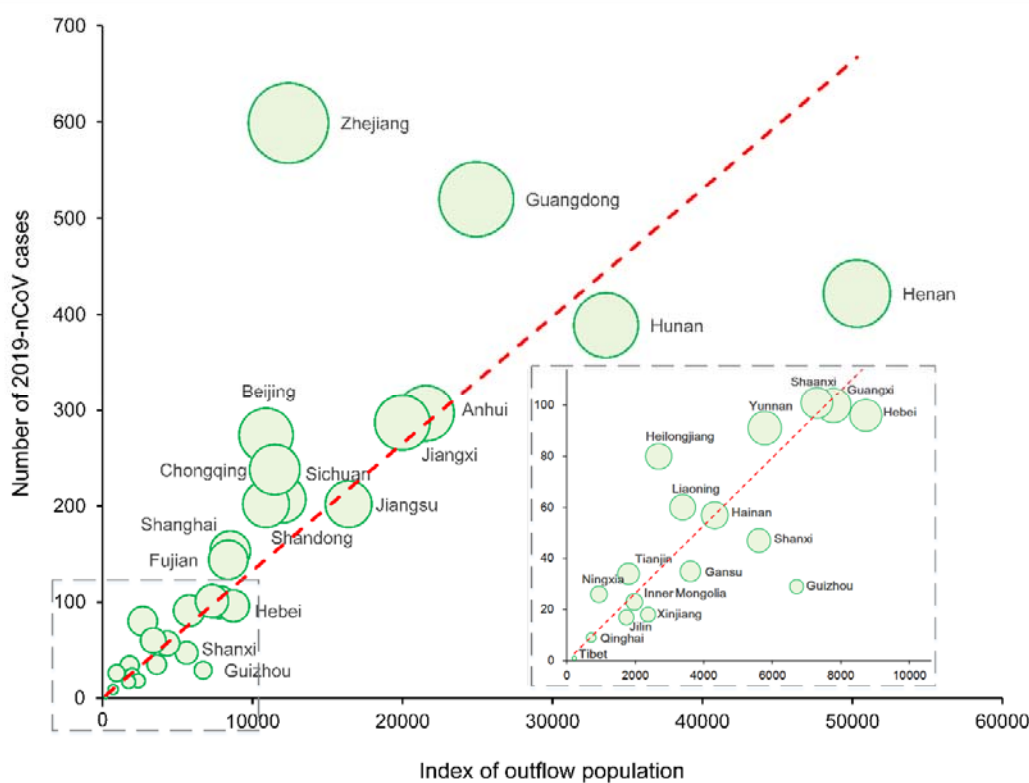

221

222 **Figure 3. The association between the number of 2019-nCoV cases and the total**

223 **index of population outflow at the provincial scale.**

224

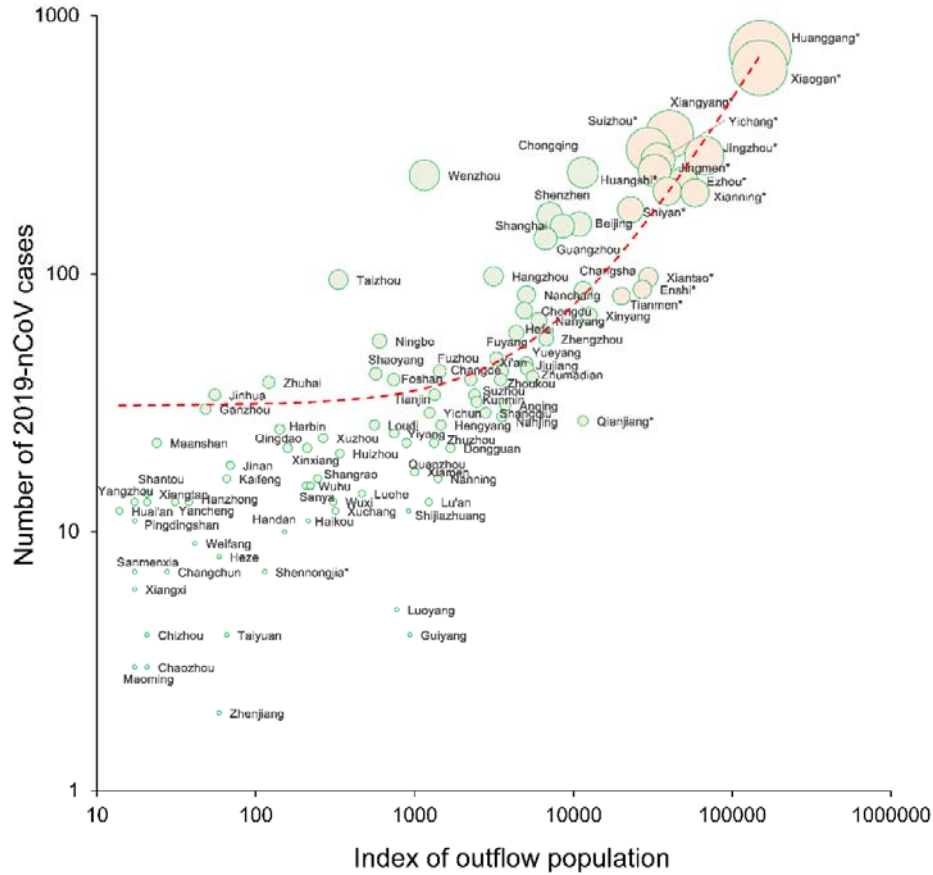

225

226 **Figure 4. The association between the number of cases and the total index of**  
227 **population outflow at the city scale.**

228

## 229 Discussion

230 Understanding the driving factors of the infectious disease is of particular importance

231 for the timely formulation of effective controlling measures. Our results revealed a

232 close relationship between the population outflow from Wuhan and the 2019-nCoV

233 infection in other areas of China. We assessed the contributions of the lockdown and

234 explored the potential effects of the measure with different implementation dates.

235 The fluctuation of outflowing population of Wuhan indicated that the lockdown

236 in Wuhan reduced the outward movement of the population effectively. However, the

237 migration data also suggested that a large number of populations of Wuhan had  
238 flowed out before 10:00 am Jan 23, 2020. and 2019-nCoV cases has been widely  
239 dispersed nationwide.

240       Distribution of population outflows and cases varied across provinces. Our  
241 finding on the effects of population movement on the disease transmission was  
242 consistent with other coronaviruses (16-18). Since the infection is transmitted through  
243 the respiratory tract and close contact, it is greatly affected by population movements.  
244 Firstly, a great number of people flowing out of Wuhan may transmit the virus to the  
245 whole country and even worldwide during the Chinese Spring Festival. Secondly, the  
246 absence of detectable symptoms during the long incubation period made it difficult to  
247 identify the cases in the early stage (13, 19). Thirdly, population movements increase  
248 the difficulty of case management and health education. All these factors promoted  
249 the transmission of 2019-nCoV. Specially, different from the H1N1 outbreak in 2009  
250 (20), the railways might play an important role in the disease transmission. Since  
251 railways were widely used before and during the Spring Festival, the area closely  
252 connected to Wuhan by railway should be the priority of infection control.

253       Our study provided timely evidence for the formulation of efficient strategies to  
254 prevent diseases from spreading out. On the one hand, the result could help assess  
255 effectiveness of the prevention and control efforts. For example, the cases in Zhejiang  
256 and Guangdong are apparently more than estimated, which indicated a better health  
257 emergency response system (i.e. higher detection efficiency) or inadequate isolation.  
258 Whereas the cases reported in Henan were much lower than expected. Two possible

259 explanations were considered: (1) Strong prevention and control measures were  
260 adopted in Henan; (2) The epidemic in Henan has been underestimated and enhanced  
261 screening efforts should be enforced. On the other hand, exploring the association was  
262 expected to help identify high-risk areas and guide health strategy formulation (21,  
263 22). Take Henan for example, great difference between estimated and reported data  
264 may imply a great increase of cases in the future, which required enhancement of the  
265 surveillance system and rational allocation of resources (18). The medicine supply,  
266 personal protective equipment, hospital supplies, and the human resources necessary  
267 to respond to an outbreak should be always ensured (23). In addition, this study could  
268 be used to guide the assessment of the risk of disease transmission and help raise  
269 public awareness. As a large number of infected people had transported to all of 31  
270 provinces, epidemics across the country may be inevitable. To halt the spread of the  
271 epidemic, harsh measures including quarantine and isolation of exposed persons,  
272 cancellation of mass gatherings, school closures, and travel restriction were needed to  
273 reduce transmission in affected areas. Furthermore, screening of people who have  
274 been to Wuhan recently was of crucial importance, especially cities with close ties to  
275 Wuhan.

276       Considering the impact of population movements on the outbreak, the Wuhan  
277 government announced the suspension of public transportation on Jan 23, 2020, with  
278 a closure of airports, railway stations, and highways, to prevent further disease  
279 transmission (24). Despite inconsistent reports on the role of the lockdown in halting  
280 the disease transmission across China (22, 23, 25), the unprecedented measure might

281 play an important role in slowing the epidemic spread, especially when an effective  
282 vaccine was developed (26, 27). In addition, to explore the impact of date selection,  
283 we estimated the changes of cases when the measure was implemented on different  
284 date. The results varied significantly, 1420 cases could be prevented with the measure  
285 implemented two days earlier, and the number of cases will increase by 1462 with the  
286 lockdown implemented two days later, suggesting that the effect of the lockdown  
287 depending on the choice of date greatly, which could provide a reference for the  
288 future outbreaks. Since the political and economic effects were not considered, further  
289 studies on secondary impacts of the measure, like socioeconomic impacts, were also  
290 warranted. Though we estimated that some cases would possibly be prevented if the  
291 policy was implemented earlier, it was actually hard to make such a huge decision  
292 given the whole picture of the infection was not clear at that stage. The authors  
293 believe that the current policy was appropriate at this complex situation.

294       There were a few limitations of our study. Firstly, for practical reasons, we used  
295 an indicator to reflect the real-time magnitude of population movements, which was  
296 acceptable considering our research purpose. Secondly, the influence of some  
297 important factors, such as socioeconomic and demographic characteristics, were not  
298 considered. Thirdly, it is assumed that the infected travelers in the population are  
299 randomly distributed (28), and that there was no significant difference in surveillance  
300 capability between cities (18), which might not be the case in reality. In addition,  
301 daily data used in this study was reported infection data, rather than the actual number  
302 of incident cases. More detailed and further in-depth studies are warranted in the



303 future.

304 In conclusion, our study indicates that the population outflow from Wuhan might  
305 be one important trigger of the 2019-nCoV infection transmission in China, and the  
306 policy of city closure is effective to prevent the epidemic and earlier implementation  
307 would be more effective. The magnitude of epidemic might be under-estimated and  
308 should be paid more attention, such as Henan and Hunan provinces.

309

### 310 **Acknowledgments**

311 We appreciated the support by National Key R&D Program of China (Grant No:  
312 2018YFA0606200). The funder had no role in study design, data collection, data  
313 analysis, data interpretation, or writing of the report. The corresponding author had  
314 full access to all the data in the study and had final responsibility for the decision to  
315 submit for publication.

316

### 317 **About the Author**

318 Mr. Ai completed this work as a Ph.D. student in Department of Epidemiology,  
319 School of Public Health, Sun Yat-sen University, his primary research direction is the  
320 spatio-temporal impact of climate change and air pollution on human health.

321

### 322 **References**

323 1. Cohen J, Normile D. New SARS-like virus in China triggers alarm. *Science*.  
324 2020 Jan 17;367(6475):234-5.

- 325 2. Li Q, Guan X, Wu P, Wang X, Zhou L, Tong Y, et al. Early Transmission  
326 Dynamics in Wuhan, China, of Novel Coronavirus–Infected Pneumonia. *New*  
327 *England Journal of Medicine*. 2020;DOI: 10.1056/NEJMoa2001316.
- 328 3. Chan JF-W, Yuan S, Kok K-H, To KK-W, Chu H, Yang J, et al. A familial cluster  
329 of pneumonia associated with the 2019 novel coronavirus indicating person-to-person  
330 transmission: a study of a family cluster. *The Lancet*. 2020.
- 331 4. Wang C, Horby PW, Hayden FG, Gao GF. A novel coronavirus outbreak of global  
332 health concern. *Lancet*. 2020 Jan 24.
- 333 5. First F. Mayor of Wuhan: more than 5 million people left Wuhan. 2020 [cited  
334 2020 Jan 13, 2020]; Available from:  
335 <http://news.sina.com.cn/2020-01-26/doc-iihnzhahk6472836.shtml>
- 336 6. Wu P, Hao X, Lau EH, Wong JY, Leung KS, Wu JT, et al. Real-time tentative  
337 assessment of the epidemiological characteristics of novel coronavirus infections in  
338 Wuhan, China, as at 22 January 2020. *Eurosurveillance*. 2020;25(3):2000044.
- 339 7. Benvenuto D, Giovannetti M, Ciccozzi A, Spoto S, Angeletti S, Ciccozzi M. The  
340 2019-new coronavirus epidemic: evidence for virus evolution. *bioRxiv*. 2020.
- 341 8. Ji W, Wang W, Zhao X, Zai J, Li X. Homologous recombination within the spike  
342 glycoprotein of the newly identified coronavirus may boost cross-species transmission  
343 from snake to human. *J Med Virol*. 2020 Jan 22.
- 344 9. Chen T, Rui J, Wang Q, Zhao Z, Cui J-A, Yin L. A mathematical model for  
345 simulating the transmission of Wuhan novel Coronavirus. *bioRxiv*.  
346 2020:2020.01.19.911669.

- 347 10. Read JM, Bridgen JR, Cummings DA, Ho A, Jewell CP. Novel coronavirus  
348 2019-nCoV: early estimation of epidemiological parameters and epidemic predictions.  
349 medRxiv. 2020.
- 350 11. Hui DS, I Azhar E, Madani TA, Ntoumi F, Kock R, Dar O, et al. The continuing  
351 2019-nCoV epidemic threat of novel coronaviruses to global health-The latest 2019  
352 novel coronavirus outbreak in Wuhan, China. *Int J Infect Dis.* 2020;91:264-6.
- 353 12. Huang C, Wang Y, Li X, Ren L, Zhao J, Hu Y, et al. Clinical features of patients  
354 infected with 2019 novel coronavirus in Wuhan, China. *Lancet.* 2020 Jan 24.
- 355 13. Li Q, Guan X, Wu P, Wang X, Zhou L, Tong Y, et al. Early Transmission  
356 Dynamics in Wuhan, China, of Novel Coronavirus-Infected Pneumonia. *N Engl J*  
357 *Med.* 2020 Jan 29.
- 358 14. Chan JF-W, Yuan S, Kok K-H, To KK-W, Chu H, Yang J, et al. A familial cluster  
359 of pneumonia associated with the 2019 novel coronavirus indicating person-to-person  
360 transmission: a study of a family cluster. *The Lancet.* 2020.
- 361 15. New coronavirus pneumonia diagnosis and treatment program (4th ed.)(in  
362 Chinese). 2020.
- 363 16. Bogoch II, Watts A, Thomas-Bachli A, Huber C, Kraemer MUG, Khan K.  
364 Pneumonia of Unknown Etiology in Wuhan, China: Potential for International Spread  
365 Via Commercial Air Travel. *Journal of Travel Medicine.* 2020.
- 366 17. Phaijoo GR, Gurung DB. Modeling Impact of Temperature and Human  
367 Movement on the Persistence of Dengue Disease. *Computational and Mathematical*  
368 *Methods in Medicine.* 2017;2017:1-9.

- 369 18. Poletto C, Pelat C, Levy-Bruhl D, Yazdanpanah Y, Boelle P, Colizza V.  
370 Assessment of the Middle East respiratory syndrome coronavirus (MERS-CoV)  
371 epidemic in the Middle East and risk of international spread using a novel maximum  
372 likelihood analysis approach. 2014.
- 373 19. Zhao Q, Zhang Y, Zhang W, Li S, Chen G, Wu Y, et al. Ambient temperature and  
374 emergency department visits: Time-series analysis in 12 Chinese cities.  
375 Environmental pollution. 2017;224:310-6.
- 376 20. Fang LQ, Wang LP, de Vlas SJ, Liang S, Tong SL, Li YL, et al. Distribution and  
377 risk factors of 2009 pandemic influenza A (H1N1) in mainland China. American  
378 journal of epidemiology. 2012 May 1;175(9):890-7.
- 379 21. Nakiire L, Mwanja H, Pillai SK, Gasanani J, Ntungire D, Nsabiyumva S, et al.  
380 Population Movement Patterns Among the Democratic Republic of the Congo,  
381 Rwanda, and Uganda During an Outbreak of Ebola Virus Disease: Results from  
382 Community Engagement in Two Districts - Uganda, March 2019. MMWR Morbidity  
383 and mortality weekly report. 2020 Jan 10;69(1):10-3.
- 384 22. Hufnagel L, Brockmann D, Geisel T. Forecast and control of epidemics in a  
385 globalized world. Proceedings of the National Academy of Sciences.  
386 2004;101(42):15124-9.
- 387 23. Wu JT, Leung K, Leung GM. Nowcasting and forecasting the potential domestic  
388 and international spread of the 2019-nCoV outbreak originating in Wuhan, China: a  
389 modelling study. The Lancet.
- 390 24. Commission CNH. Announcement from the Headquarter for novel coronavirus

391 pneumonia prevention and control (No. 1). 2020 [cited Jan 31, 2020]; Available  
392 from: [http://www.gov.cn/xinwen/2020-01/23/  
393 content\\_5471751.htm](http://www.gov.cn/xinwen/2020-01/23/content_5471751.htm)

394 25. Read JM, Bridgen JRE, Cummings DAT, Ho A, Jewell CP. Novel coronavirus  
395 2019-nCoV: early estimation of epidemiological parameters and epidemic predictions.  
396 2020.

397 26. Cooper BS, Pitman RJ, Edmunds WJ, Gay NJ. Delaying the international spread  
398 of pandemic influenza. PLoS medicine. 2006 Jun;3(6):e212.

399 27. Brownstein JS, Wolfe CJ, Mandl KD. Empirical evidence for the effect of airline  
400 travel on inter-regional influenza spread in the United States. PLoS medicine. 2006  
401 Sep;3(10):e401.

402 28. Nah K, Otsuki S, Chowell G, Nishiura H. Predicting the international spread of  
403 Middle East respiratory syndrome (MERS). BMC Infect Dis. 2016 Jul 22;16:356.  
404
